# Supplementary material for: Human microRNA (miR-20b-5p) modulates Alzheimer’s disease pathways and neuronal function, and a specific polymorphism close to the MIR20B gene influences Alzheimer’s biomarkers
Source: PubMed Central journal article supplement (PMC9054681; doi:10.1038/s41380-021-01351-3), 2022-01-27

**Human microRNA (miR-20b-5p) modulates Alzheimer's disease pathways and neuronal function, and a specific polymorphism close to the *MIR20B* gene influences Alzheimer's biomarkers.**

*Ruizhi Wang,<sup>1\*</sup> Nipun Chopra,<sup>1\*</sup> Kwangsik Nho,<sup>2\*</sup> Bryan Maloney,<sup>1</sup> Alexander G. Obukhov,<sup>3</sup> Peter T. Nelson,<sup>4</sup> Scott E. Counts,<sup>5</sup> Debomoy K. Lahiri<sup>1,6#</sup>*

<sup>1</sup>Laboratory of Molecular Neurogenetics, Department of Psychiatry, Indiana Alzheimer's Disease Research Center, Indiana University School of Medicine, Indianapolis, IN-46202, USA;

<sup>2</sup>Radiology, Indiana University School of Medicine, Indianapolis, IN-46202, USA;

<sup>3</sup>Anatomy, Cell Biology & Physiology, Indiana University School of Medicine, Indianapolis, IN-46202, USA;

<sup>4</sup>Sanders-Brown Center on Aging, University of Kentucky, Kentucky Alzheimer's Disease Research Center, Lexington, KY, 40536, USA;

<sup>5</sup>Departments of Translational Neuroscience and Family Medicine, Michigan State University, Grand Rapids, MI, USA; Michigan Alzheimer's Disease Research Center, Ann Arbor, MI, 48109, USA

<sup>6</sup>Department of Medical & Molecular Genetics, Indiana University School of Medicine, Indianapolis, IN, USA;

\*NC, RW and KN contributed equally

Present address: N. Chopra: DePauw University, Greencastle, IN 46135

# Corresponding author: [dlahiri@iupui.edu](mailto:dlahiri@iupui.edu)

**Supplemental Table 1. Tjur's  $D$  of miR-20b vs. diagnosis models**

| Effect                                    | Absolute Quantitation |                 |         |         | $\Delta\Delta CT$ |       |       |         |
|-------------------------------------------|-----------------------|-----------------|---------|---------|-------------------|-------|-------|---------|
|                                           | Full Model            | TL <sup>a</sup> | CB      | PCC     | Full Model        | TL    | CB    | PCC     |
| miR-20b                                   | 0.021                 | 0.003           | 0.044   | < 0.001 | 0.024             | 0.117 | 0.048 | < 0.001 |
| <i>APOE</i> $\epsilon$ 4 presence         | 0.010                 | 0.013           | 0.031   | < 0.001 | 0.085             | 0.191 | 0.098 | < 0.001 |
| Brain Region                              | 0.004                 | 0.029           | < 0.001 | < 0.001 | 0.091             | 0.150 | 0.144 | < 0.001 |
| <i>APOE</i> $\epsilon$ 4 $\times$ miR-20b | < 0.001               | 0.001           | 0.005   | < 0.001 | 0.020             | 0.110 | 0.039 | < 0.001 |

<sup>a</sup>TL, CB, and PCC refer to  $D$  calculated on the predictions of that brain region.

**Supplemental Table 2. Major AD-related proteins used as network building seeds.**

| <b>Protein</b> | <b>Category<sup>a</sup></b> | <b>miR-20b<sup>b</sup></b> |
|----------------|-----------------------------|----------------------------|
| ADAM10         | Amyloid                     | +                          |
| ADAM17         | Amyloid                     | +                          |
| ADAM9          | Amyloid                     | +                          |
| APOE           | Regulator                   |                            |
| APP            | Amyloid                     | +                          |
| BACE1          | Amyloid                     | +                          |
| ECE1           | Clearance                   |                            |
| GSK3A          | Tau                         |                            |
| GSK3B          | Tau                         |                            |
| IDE            | Clearance                   | +                          |
| IL1A           | Amyloid                     | +                          |
| IRP1           | Amyloid                     |                            |
| IRP2           | Amyloid                     |                            |
| MAPK13         | Tau                         |                            |
| MAPT           | Tau                         | +                          |
| MME            | Clearance                   | +                          |
| PSD95          | Synaptic                    |                            |
| PSEN1          | Amyloid                     |                            |
| PSEN2          | Amyloid                     |                            |
| REST           | Regulator                   |                            |
| SNAP25         | Synaptic                    | +                          |
| SNCA           | Regulator                   | +                          |
| SYPH           | Synaptic                    |                            |

<sup>a</sup>Classification vs. AD relationship, specifically, Amyloid: APP, APP processing enzyme, or APP translation factor; Clearance: A $\beta$  clearing enzyme; Regulator: Protein with functions/effects on both A $\beta$  and hyperphosphorylated tau protein; Tau: either MAPT or one of its major kinases.

<sup>b</sup>Predicted or confirmed to interact with miR-20b-50

**Supplemental Table 3. Predicted miR-20b-5p sites on VGCC subunits**

| <b>Subunit</b> | <b>Prob<sup>a</sup></b> | <b>ΔG</b> |
|----------------|-------------------------|-----------|
| CACNA1A        | no sites                | no sites  |
| CACNA1B        | 0.148                   | -17.4     |
| CACNA1C        | 0.453                   | -19.0     |
| CACNA1C        | 0.386                   | -16.9     |
| CACNA1C        | 0.373                   | -15.4     |
| CACNA1C        | 0.305                   | -17.7     |
| CACNA1D        | 0.524                   | -14.1     |
| CACNA1D        | 0.431                   | -20.1     |
| CACNA1E        | 0.488                   | -16.6     |
| CACNA1E        | 0.298                   | -14.7     |
| CACNA1F        | no sites                | no sites  |
| CACNA1G        | no sites                | no sites  |
| CACNA1H        | no sites                | no sites  |
| CACNA1I        | 0.125                   | -24.3     |
| CACNA1I        | 0.101                   | -22.4     |
| CACNA1S        | no sites                | no sites  |
| CACNA2D1       | 0.768                   | -24.3     |
| CACNA2D1       | 0.604                   | -15.8     |
| CACNA2D1       | 0.550                   | -14.4     |
| CACNA2D1       | 0.375                   | -13.8     |
| CACNA2D2       | 0.272                   | -21.5     |
| CACNA2D3       | no sites                | no sites  |
| CACNA2D4       | 0.430                   | -18.8     |
| CACNB1         | 0.272                   | -16.6     |
| CACNB2         | 0.812                   | -19.9     |
| CACNB2         | 0.463                   | -21.0     |
| CACNB3         | no sites                | no sites  |
| CACNB4         | 0.840                   | -19.8     |

<sup>a</sup>Estimated probability that the sequence affinity site is likely to be a miRNA binding site.

**Fig. S1. Treatment with miR-20b-5p and APP siRNA alters Calcium influx.** **A)** “Idealized” Fura response curve derived from mean of all traces. Specific points and distances of interest are described in main text. **B)** Raw mean Fura traces by treatment. **C)** Fura curves with values adjusted to the distance between “0” and “1” = 0. **D)** Fura curves scaled to minimum and maximum values for each treatment.

**Fig. S2. Typical photomicrographs of miR-20b treatment of PHB cultures.** PHB cultures were treated with miR-20b as described in the main text and grown in an incubator while photographed with the IncuCyte. Typical photographs for **A)** Mock-treated and **B)** miR-20b treated cells are shown. Apparent cell density reduction accompanied miR-20b treatment. Scales are shown on photographs.

**Fig. S3. Model of miR-20b-5p effects via APP on development and neurodegeneration.** A proposed model that relates our data to overall neurological effects on miR-20b-5p. **A)** Under developmental downregulation, increased miR-20b-5p would downregulate APP, resulting, through different pathways, of neurological pruning. **B)** If miR-20b-5p were upregulated, this would contribute to neuroproliferation. **C)** Late in life, elevation of miR-20b-5p would effectively enhance neuroprotection primarily through reducing excitotoxic processes. **D)** Reduction of miR-20b-5p late in life would contribute to excitotoxicity through APP upregulation, leading to neurodegeneration.

**S1****A. "Idealized" Response**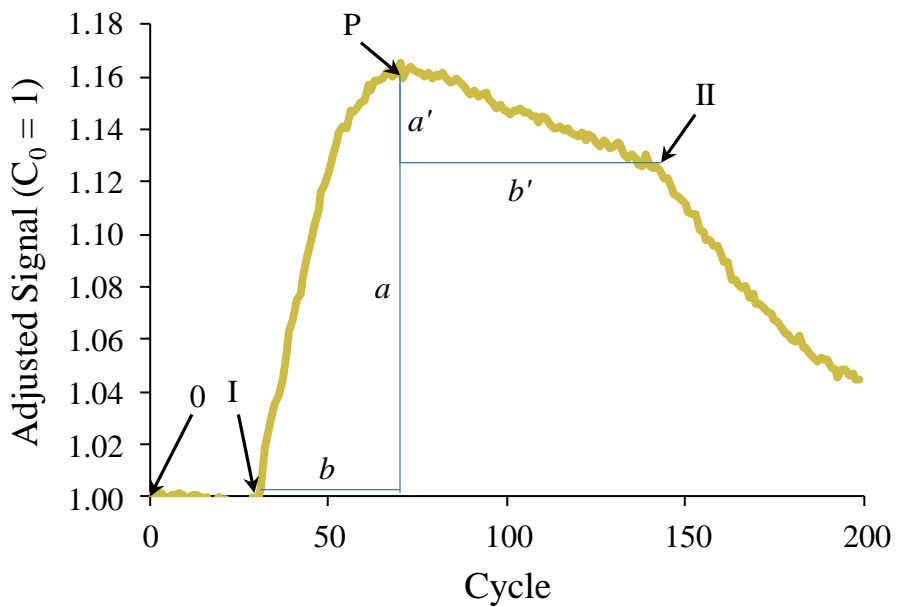**B. Raw Response**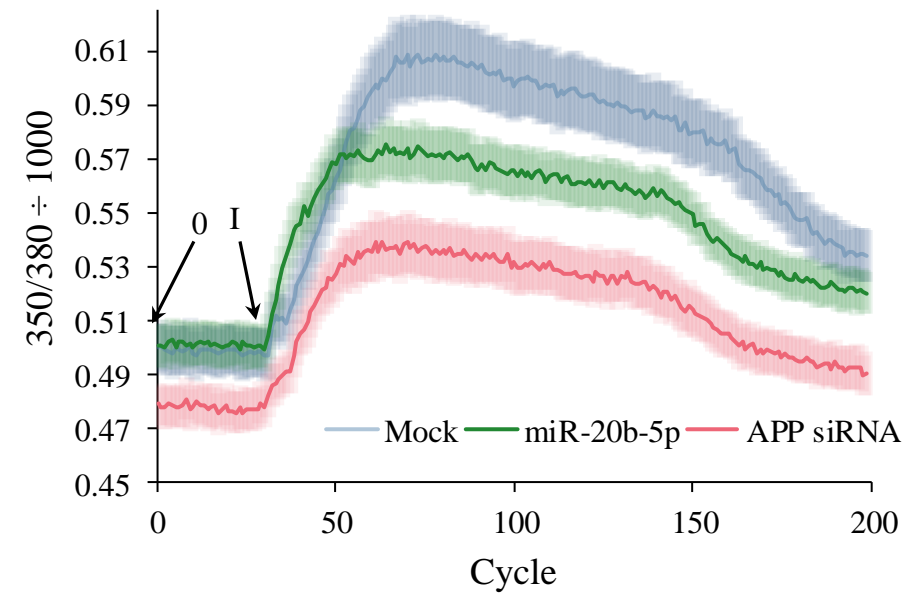**C. Adjusted to Cycle<sub>0</sub> = 1**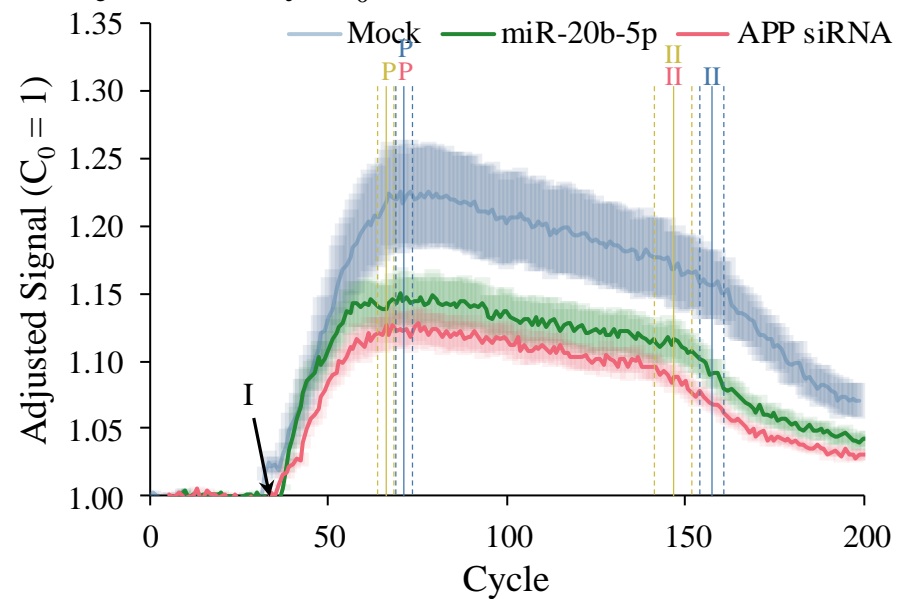**D. Min/Max Scaled**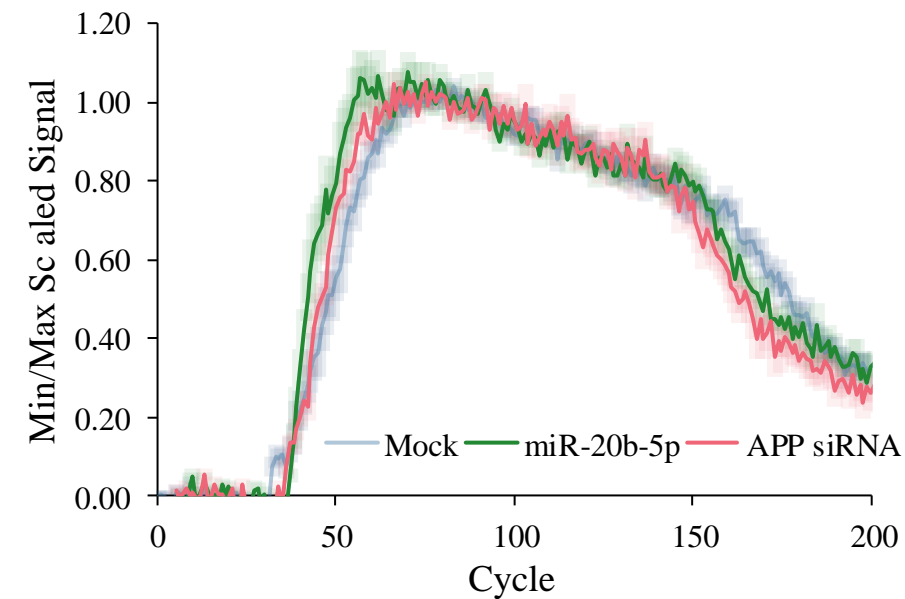

A. Mock

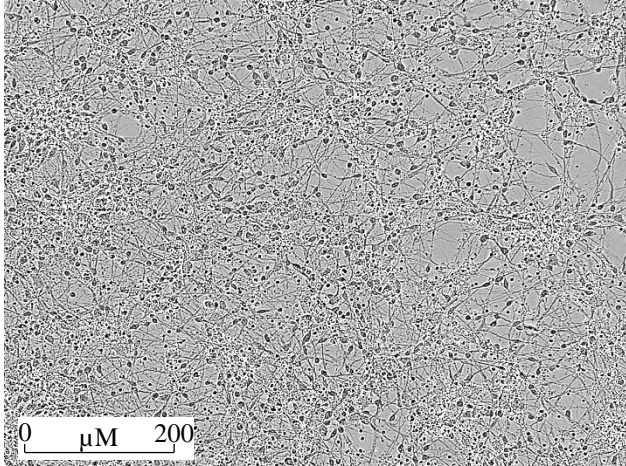

B. miR-20b

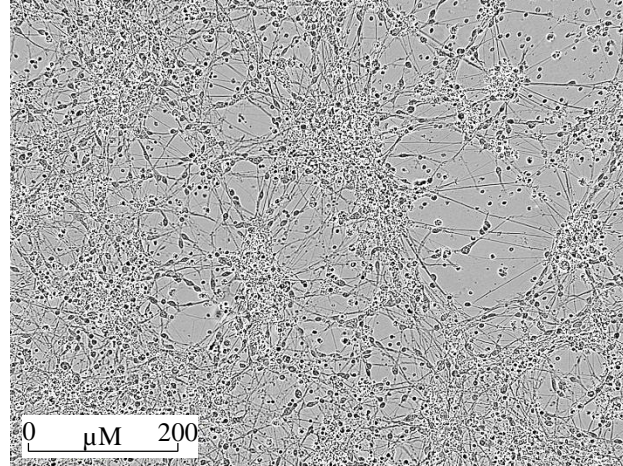

# S3

## A. Developmental Downregulation

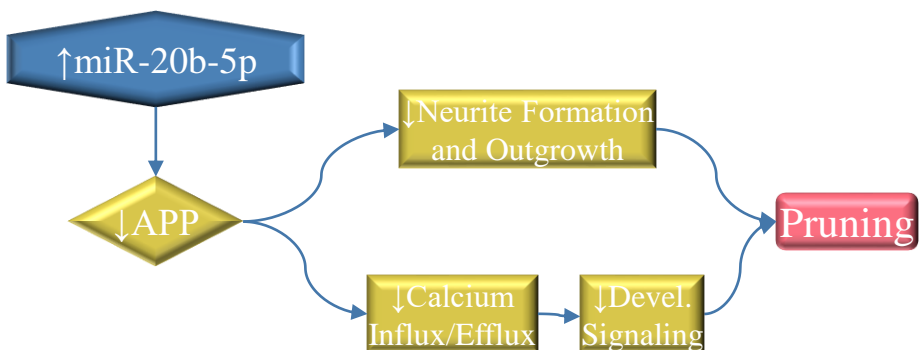

## B. Developmental Upregulation

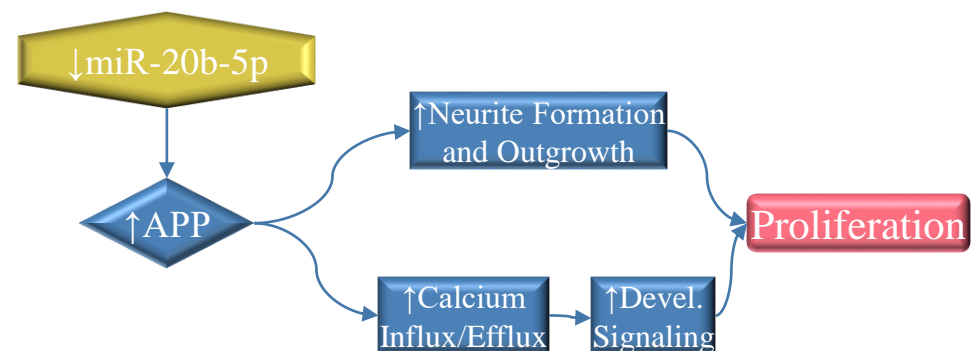

## C. Late-Life Maintenance

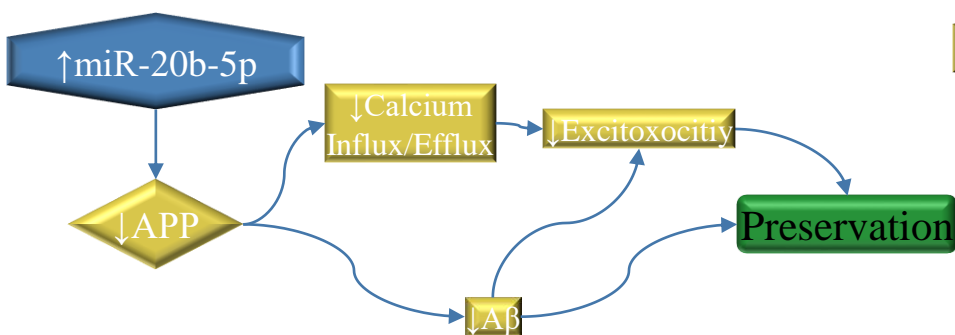

## D. Late-Life Degeneration

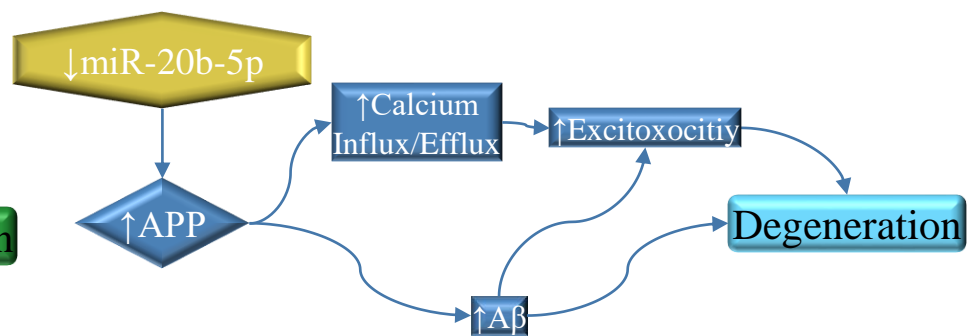

Supplement: 41380_2021_1351_MOESM1_ESM.pdf [file 41380_2021_1351_MOESM1_ESM.pdf]
